# Supplementary material for: Systematic review with radiomics quality score of cholangiocarcinoma: an EuSoMII Radiomics Auditing Group Initiative
Source: PubMed Central journal article supplement (PMC9889586; doi:10.1186/s13244-023-01365-1), 2023-02-01
Supplement: 13244_2023_1365_MOESM2_ESM.pdf [file 13244_2023_1365_MOESM2_ESM.pdf]

## ELECTRONIC SUPPLEMENTARY MATERIAL

### Systematic review with radiomics quality score of cholangiocarcinoma: an EuSoMI Radiomics Auditing Group Initiative

**Supplementary Table 1:** Detailed checklist of the radiomics quality score with corresponding checkpoints and items as reported by Lambin et al [5].

| Checkpoints  | Items                                                        | Scores                                                                                                                                                  |
|--------------|--------------------------------------------------------------|---------------------------------------------------------------------------------------------------------------------------------------------------------|
| Checkpoint 1 | Item 1: Image protocol quality                               | +1 if protocols are well-documented; +1 if public protocol is used.                                                                                     |
| Checkpoint 2 | Item 2: Multiple segmentations                               | +1 if segmentation by different physicians/algorithms/software, perturbing segmentations by (random) noise, segmentation at different breathing cycles. |
|              | Item 3: Phantom study                                        | +1 if detect inter-scanner differences and vendor-dependent features.                                                                                   |
|              | Item 4: Imaging at multiple time points                      | +1 if analyze feature robustness to temporal variabilities (for example, organ movement, organ expansion/shrinkage).                                    |
| Checkpoint 3 | Item 5: Feature reduction or adjustment for multiple testing | -3 if neither measure is implemented; +3 if either measure is implemented.                                                                              |
|              | Item 6: Multivariable analysis with non-radiomics features   | +1 if non-radiomics features are included in the model.                                                                                                 |
|              | Item 7: Detect and discuss biological correlates             | +1 if discuss biological correlates.                                                                                                                    |
|              | Item 8: Cut-off analyses                                     | +1 if determine risk groups by either the median, a previously published cut-off or report a continuous risk variable.                                  |
|              | Item 9: Discrimination statistics                            | +1 if a discrimination statistic and its statistical significance are reported; +1 if a resampling method technique is also applied.                    |
|              | Item 10: Calibration statistics                              | +1 if a calibration statistic and its statistical significance are reported; +1 if a resampling method technique is also applied.                       |

|  |                                                           |                                                                                                                                                                                                                                                                                                                                                                                  |
|--|-----------------------------------------------------------|----------------------------------------------------------------------------------------------------------------------------------------------------------------------------------------------------------------------------------------------------------------------------------------------------------------------------------------------------------------------------------|
|  | Item 11: Prospective study registered in a trial database | +7 if prospective validation of a radiomics signature in an appropriate trial.                                                                                                                                                                                                                                                                                                   |
|  | Item 12: Validation                                       | -5 if validation is missing; +2 if validation is based on a dataset from the same institute; + 3 if validation is based on a dataset from another institute; + 4 if validation is based on two datasets from two distinct institutes; + 4 if the study validates a previously published signature; + 5 if validation is based on three or more datasets from distinct institutes |
|  | Item 13: Comparison to gold standard                      | +2 if assess the extent to which the model agrees with/is superior to the current 'gold standard' method.                                                                                                                                                                                                                                                                        |
|  | Item 14: Potential clinical utility                       | +2 if report on the current and potential application of the model in a clinical setting.                                                                                                                                                                                                                                                                                        |
|  | Item 15: Cost-effectiveness analysis                      | +1 if report on the cost-effectiveness of the clinical application.                                                                                                                                                                                                                                                                                                              |
|  | Item 16: Open science and data                            | +1 if scans are open source; +1 if region of interest segmentations are open source; +1 if code is open source; +1 if radiomics features are calculated on a set of representative ROIs and the calculated features and representative ROIs are open source.                                                                                                                     |

**Supplementary Table 2:** Radiomics quality score of the included studies assessed by the Reader 1.

|               | Item 1 | Item 2 | Item 3 | Item 4 | Item 5 | Item 6 | Item 7 | Item 8 | Item 9 | Item 10 | Item 11 | Item 12 | Item 13 | Item 14 | Item 15 | Item 16 | RQS (%)    |
|---------------|--------|--------|--------|--------|--------|--------|--------|--------|--------|---------|---------|---------|---------|---------|---------|---------|------------|
| Chu [14]      | 1      | 1      | 0      | 0      | 3      | 1      | 0      | 0      | 2      | 0       | 0       | 2       | 2       | 0       | 0       | 0       | 11 (30.6%) |
| Duda [15]     | 1      | 1      | 0      | 0      | 3      | 0      | 0      | 0      | 0      | 0       | 0       | -5      | 0       | 0       | 0       | 0       | 1 (2.8%)   |
| Hamn [16]     | 1      | 0      | 0      | 0      | -3     | 0      | 0      | 0      | 2      | 0       | 0       | 2       | 2       | 0       | 0       | 0       | 3 (8.3%)   |
| Huang [17]    | 1      | 1      | 0      | 0      | 3      | 0      | 0      | 0      | 0      | 0       | 0       | 2       | 0       | 0       | 0       | 0       | 8 (22.2%)  |
| Ji [18]       | 1      | 1      | 0      | 0      | 3      | 1      | 0      | 1      | 2      | 2       | 0       | 2       | 2       | 2       | 0       | 0       | 16 (44.4%) |
| Ji [19]       | 1      | 0      | 0      | 0      | 3      | 0      | 0      | 1      | 2      | 2       | 0       | 2       | 2       | 2       | 0       | 0       | 14 (38.9%) |
| King [20]     | 0      | 0      | 0      | 0      | -3     | 1      | 0      | 0      | 2      | 0       | 0       | -5      | 2       | 0       | 0       | 0       | -4 (0%)    |
| Liang [21]    | 1      | 1      | 0      | 0      | 3      | 1      | 0      | 0      | 0      | 2       | 0       | 2       | 0       | 2       | 0       | 0       | 12 (33.3%) |
| Liu [22]      | 1      | 0      | 0      | 0      | 3      | 0      | 0      | 0      | 0      | 0       | 0       | -5      | 0       | 0       | 0       | 0       | 1 (2.8%)   |
| Mosconi [23]  | 0      | 0      | 0      | 0      | 3      | 1      | 0      | 0      | 0      | 0       | 0       | -5      | 0       | 0       | 0       | 0       | 0 (0%)     |
| Nakai [24]    | 1      | 0      | 0      | 0      | -3     | 0      | 0      | 0      | 2      | 0       | 0       | 2       | 2       | 0       | 0       | 0       | 4 (11.1%)  |
| Park [25]     | 1      | 1      | 0      | 0      | 3      | 1      | 0      | 0      | 2      | 2       | 0       | 5       | 2       | 2       | 0       | 0       | 18 (50.0%) |
| Park [26]     | 1      | 1      | 0      | 0      | -3     | 1      | 0      | 0      | 2      | 0       | 0       | -5      | 2       | 0       | 0       | 0       | -2 (0%)    |
| Ponnoprat[27] | 2      | 0      | 0      | 0      | 3      | 0      | 0      | 0      | 0      | 0       | 0       | 2       | 0       | 0       | 0       | 1       | 9 (25.0%)  |
| Qin [28]      | 0      | 1      | 0      | 0      | 3      | 1      | 0      | 0      | 2      | 0       | 0       | 4       | 2       | 0       | 0       | 1       | 15 (41.7%) |
| Sadot [29]    | 1      | 0      | 0      | 0      | -3     | 0      | 1      | 0      | 0      | 0       | 0       | -5      | 0       | 0       | 0       | 0       | -5 (0%)    |
| Silva [30]    | 0      | 1      | 0      | 0      | -3     | 1      | 0      | 1      | 2      | 0       | 0       | -5      | 2       | 0       | 0       | 0       | -1 (0%)    |
| Tang [31]     | 1      | 0      | 0      | 0      | 3      | 0      | 0      | 0      | 0      | 0       | 0       | 2       | 0       | 0       | 0       | 1       | 8 (22.2%)  |
| Tang [32]     | 1      | 1      | 0      | 0      | 3      | 1      | 0      | 1      | 2      | 0       | 0       | 2       | 2       | 0       | 0       | 0       | 13 (36.1%) |
| Wang [33]     | 0      | 0      | 0      | 0      | 3      | 0      | 0      | 0      | 0      | 0       | 0       | -5      | 0       | 0       | 0       | 0       | -1 (0%)    |

|            |   |   |   |   |    |   |   |   |   |   |   |    |   |   |   |   |   |         |
|------------|---|---|---|---|----|---|---|---|---|---|---|----|---|---|---|---|---|---------|
| Wang [34]  |   |   |   |   |    |   |   |   |   |   |   |    |   |   |   |   |   | 12      |
|            | 1 | 1 | 0 | 0 | 3  | 1 | 0 | 0 | 2 | 0 | 0 | 2  | 2 | 0 | 0 | 0 | 0 | (33.3%) |
| Xu [35]    |   |   |   |   |    |   |   |   |   |   |   |    |   |   |   |   |   | 9       |
|            | 1 | 1 | 0 | 0 | 3  | 0 | 0 | 0 | 0 | 0 | 0 | 2  | 0 | 0 | 0 | 0 | 0 | (25.0%) |
| Xu [36]    |   |   |   |   |    |   |   |   |   |   |   |    |   |   |   |   |   | 10      |
|            | 1 | 0 | 0 | 0 | 3  | 1 | 0 | 0 | 2 | 0 | 0 | 2  | 2 | 0 | 0 | 0 | 0 | (27.8%) |
| Xu [37]    |   |   |   |   |    |   |   |   |   |   |   |    |   |   |   |   |   | 16      |
|            | 1 | 1 | 0 | 0 | 3  | 1 | 0 | 1 | 2 | 2 | 0 | 2  | 2 | 2 | 0 | 0 | 0 | (44.4%) |
| Xue [38]   |   |   |   |   |    |   |   |   |   |   |   |    |   |   |   |   |   | 13      |
|            | 1 | 1 | 0 | 0 | 3  | 1 | 0 | 0 | 0 | 2 | 0 | 2  | 0 | 2 | 0 | 0 | 0 | (36.1%) |
| Xue [39]   |   |   |   |   |    |   |   |   |   |   |   |    |   |   |   |   |   | 11      |
|            | 1 | 1 | 0 | 0 | 3  | 1 | 0 | 0 | 0 | 0 | 0 | 2  | 0 | 0 | 0 | 0 | 0 | (30.6%) |
| Yang [40]  |   |   |   |   |    |   |   |   |   |   |   |    |   |   |   |   |   | 8       |
|            | 1 | 1 | 0 | 0 | 3  | 0 | 0 | 0 | 0 | 0 | 0 | 2  | 0 | 0 | 0 | 0 | 0 | (22.2%) |
| Yao [41]   |   |   |   |   |    |   |   |   |   |   |   |    |   |   |   |   |   | 9       |
|            | 1 | 1 | 0 | 0 | 3  | 0 | 0 | 0 | 0 | 0 | 0 | 2  | 0 | 0 | 0 | 0 | 0 | (25.0%) |
| Zhang [42] |   |   |   |   |    |   |   |   |   |   |   |    |   |   |   |   |   | 8       |
|            | 1 | 1 | 0 | 0 | 3  | 1 | 1 | 1 | 2 | 0 | 0 | -5 | 2 | 0 | 0 | 0 | 0 | (22.2%) |
| Zhang [43] |   |   |   |   |    |   |   |   |   |   |   |    |   |   |   |   |   | 2       |
| Zhang [44] | 1 | 0 | 0 | 0 | 3  | 1 | 0 | 0 | 0 | 2 | 0 | -5 | 0 | 2 | 0 | 0 | 0 | (5.6%)  |
|            |   |   |   |   |    |   |   |   |   |   |   |    |   |   |   |   |   | 15      |
|            | 1 | 1 | 0 | 0 | 3  | 1 | 0 | 0 | 2 | 2 | 0 | 2  | 2 | 2 | 0 | 0 | 0 | (41.7%) |
| Zhang [45] |   |   |   |   |    |   |   |   |   |   |   |    |   |   |   |   |   | 3       |
| Zhao [46]  | 1 | 1 | 0 | 0 | 3  | 0 | 0 | 1 | 0 | 0 | 0 | -5 | 0 | 0 | 0 | 0 | 0 | (8.3%)  |
|            |   |   |   |   |    |   |   |   |   |   |   |    |   |   |   |   |   | 15      |
|            | 1 | 1 | 0 | 0 | 3  | 1 | 0 | 0 | 2 | 2 | 0 | 2  | 2 | 2 | 0 | 0 | 0 | (41.7%) |
| Zhao [47]  |   |   |   |   |    |   |   |   |   |   |   |    |   |   |   |   |   | 15      |
|            | 1 | 1 | 0 | 0 | 3  | 1 | 0 | 1 | 2 | 2 | 0 | 2  | 2 | 2 | 0 | 0 | 0 | (41.7%) |
| Zhao [48]  |   |   |   |   |    |   |   |   |   |   |   |    |   |   |   |   |   | -2      |
| Zhou [49]  | 1 | 1 | 0 | 0 | -3 | 1 | 0 | 0 | 2 | 0 | 0 | -5 | 2 | 0 | 0 | 0 | 0 | (0%)    |
|            |   |   |   |   |    |   |   |   |   |   |   |    |   |   |   |   |   | 9       |
|            | 1 | 1 | 0 | 0 | 3  | 0 | 0 | 1 | 0 | 0 | 0 | 2  | 0 | 0 | 0 | 0 | 0 | (25.0%) |
| Zhu [50]   |   |   |   |   |    |   |   |   |   |   |   |    |   |   |   |   |   | -5      |
| Zhu [51]   | 1 | 1 | 0 | 0 | -3 | 0 | 0 | 0 | 0 | 0 | 0 | -5 | 0 | 0 | 0 | 0 | 0 | (0%)    |
|            |   |   |   |   |    |   |   |   |   |   |   |    |   |   |   |   |   | 13      |
|            | 1 | 1 | 0 | 0 | 3  | 1 | 0 | 0 | 2 | 2 | 0 | 2  | 2 | 2 | 0 | 0 | 0 | (36.1%) |

**Supplementary Table 3:** Radiomics quality score of the included studies assessed by the Reader 2.

|                | Item 1 | Item 2 | Item 3 | Item 4 | Item 5 | Item 6 | Item 7 | Item 8 | Item 9 | Item 10 | Item 11 | Item 12 | Item 13 | Item 14 | Item 15 | Item 16 | RQS (%)    |
|----------------|--------|--------|--------|--------|--------|--------|--------|--------|--------|---------|---------|---------|---------|---------|---------|---------|------------|
| Chu [14]       | 1      | 1      | 0      | 0      | 3      | 1      | 0      | 0      | 1      | 0       | 0       | 2       | 0       | 2       | 0       | 0       | 11 (30.6%) |
| Duda [15]      | 0      | 0      | 0      | 0      | 3      | 0      | 0      | 0      | 1      | 0       | 0       | -5      | 0       | 0       | 0       | 0       | -1 (0%)    |
| Hamn [16]      | 1      | 0      | 0      | 1      | 0      | 0      | 1      | 0      | 1      | 0       | 0       | 2       | 2       | 0       | 0       | 0       | 8 (22.2%)  |
| Huang [17]     | 1      | 1      | 0      | 0      | 3      | 0      | 1      | 0      | 1      | 0       | 0       | -5      | 0       | 2       | 0       | 0       | 4 (11.1%)  |
| Ji [18]        | 1      | 1      | 0      | 0      | 3      | 1      | 1      | 0      | 2      | 0       | 0       | 2       | 0       | 2       | 0       | 0       | 13 (36.1%) |
| Ji [19]        | 1      | 1      | 0      | 0      | 3      | 0      | 1      | 0      | 2      | 1       | 0       | 2       | 2       | 2       | 0       | 0       | 15 (41.7%) |
| King [20]      | 0      | 1      | 0      | 0      | -3     | 0      | 1      | 0      | 1      | 0       | 0       | -5      | 0       | 0       | 0       | 0       | -5 (0%)    |
| Liang [21]     | 1      | 1      | 0      | 0      | 3      | 1      | 1      | 0      | 2      | 1       | 0       | 2       | 0       | 2       | 0       | 0       | 14 (38.9%) |
| Liu [22]       | 1      | 0      | 0      | 0      | 3      | 0      | 0      | 0      | 2      | 0       | 0       | -5      | 2       | 2       | 0       | 0       | 5 (13.9%)  |
| Mosconi [23]   | 0      | 1      | 1      | 0      | 3      | 0      | 1      | 0      | 2      | 0       | 0       | -5      | 0       | 2       | 0       | 0       | 5 (13.9%)  |
| Nakai [24]     | 1      | 0      | 0      | 0      | -3     | 1      | 1      | 0      | 2      | 0       | 0       | 2       | 2       | 0       | 0       | 0       | 6 (16.7%)  |
| Park [25]      | 1      | 1      | 0      | 0      | 3      | 0      | 1      | 0      | 2      | 1       | 0       | 5       | 2       | 2       | 0       | 0       | 18 (50.0%) |
| Park [26]      | 1      | 1      | 0      | 0      | 3      | 1      | 0      | 0      | 0      | 0       | 0       | -5      | 0       | 2       | 0       | 0       | 3 (8.3%)   |
| Ponnopratt[27] | 1      | 0      | 0      | 0      | -3     | 0      | 0      | 0      | 0      | 0       | 0       | 2       | 0       | 2       | 0       | 0       | 2 (5.6%)   |
| Qin [28]       | 0      | 1      | 0      | 0      | -3     | 1      | 0      | 1      | 2      | 1       | 0       | 3       | 2       | 2       | 0       | 1       | 11 (30.6%) |
| Sadot [29]     | 1      | 0      | 0      | 0      | -3     | 0      | 1      | 0      | 0      | 0       | 0       | -5      | 0       | 2       | 0       | 0       | -4 (0%)    |
| Silva [30]     | 0      | 1      | 0      | 0      | 3      | 0      | 0      | 1      | 2      | 1       | 0       | -5      | 0       | 2       | 0       | 0       | 5 (13.9%)  |
| Tang [31]      | 1      | 0      | 0      | 0      | 3      | 0      | 0      | 0      | 1      | 0       | 0       | 2       | 0       | 0       | 0       | 0       | 7 (19.4%)  |

|            |   |   |   |   |    |   |   |   |   |   |   |    |   |   |   |   |          |
|------------|---|---|---|---|----|---|---|---|---|---|---|----|---|---|---|---|----------|
| Tang [32]  |   |   |   |   |    |   |   |   |   |   |   |    |   |   |   |   | 8        |
| Wang [33]  | 1 | 0 | 0 | 0 | 3  | 0 | 0 | 0 | 0 | 0 | 0 | 2  | 0 | 2 | 0 | 0 | (22.2%)9 |
| Wang [34]  | 0 | 0 | 0 | 0 | 3  | 0 | 0 | 0 | 1 | 0 | 0 | -5 | 0 | 0 | 0 | 0 | -1 (0%)  |
| Xu [35]    | 1 | 0 | 0 | 0 | 3  | 1 | 0 | 0 | 2 | 2 | 0 | 3  | 0 | 2 | 0 | 0 | 14       |
| Xu [36]    | 1 | 1 | 0 | 0 | 3  | 0 | 1 | 0 | 2 | 0 | 0 | 2  | 0 | 0 | 0 | 0 | (38.9%)  |
| Xu [37]    | 0 | 1 | 0 | 0 | 3  | 1 | 0 | 1 | 1 | 0 | 0 | 2  | 0 | 0 | 0 | 0 | 10       |
| Xue [38]   | 1 | 1 | 0 | 0 | 3  | 1 | 0 | 0 | 2 | 1 | 0 | 2  | 0 | 2 | 0 | 0 | (27.8%)  |
| Xue [39]   | 1 | 1 | 0 | 0 | 3  | 1 | 0 | 0 | 1 | 2 | 0 | 3  | 0 | 2 | 0 | 1 | 9        |
| Yang [40]  | 1 | 1 | 0 | 0 | 3  | 1 | 0 | 0 | 2 | 2 | 0 | 3  | 0 | 2 | 0 | 1 | (25.0%)  |
| Yao [41]   | 1 | 1 | 0 | 0 | 3  | 0 | 0 | 0 | 0 | 0 | 0 | 2  | 0 | 0 | 0 | 0 | 13       |
| Zhang [42] | 1 | 1 | 0 | 0 | 3  | 0 | 0 | 0 | 2 | 0 | 0 | 2  | 0 | 0 | 0 | 0 | (36.1%)  |
| Zhang [43] | 0 | 0 | 0 | 0 | 3  | 1 | 1 | 0 | 2 | 0 | 0 | -5 | 0 | 0 | 0 | 0 | 15       |
| Zhang [44] | 1 | 0 | 0 | 0 | 3  | 1 | 1 | 0 | 1 | 2 | 0 | -5 | 0 | 2 | 0 | 0 | (41.7%)  |
| Zhang [45] | 0 | 1 | 0 | 0 | 3  | 1 | 0 | 0 | 1 | 2 | 0 | 2  | 0 | 2 | 0 | 0 | 16       |
| Zhao [46]  | 1 | 1 | 0 | 0 | -3 | 0 | 1 | 0 | 1 | 1 | 0 | -5 | 0 | 2 | 0 | 0 | (44.4%)  |
| Zhao [47]  | 1 | 1 | 0 | 0 | 3  | 0 | 0 | 0 | 1 | 2 | 0 | 2  | 0 | 2 | 0 | 0 | 7        |
| Zhao [48]  | 1 | 1 | 0 | 0 | 3  | 1 | 0 | 0 | 1 | 2 | 0 | 2  | 0 | 2 | 0 | 0 | (19.4%)  |
| Zhou [49]  | 1 | 1 | 0 | 0 | -3 | 1 | 0 | 0 | 1 | 0 | 0 | -5 | 0 | 2 | 0 | 0 | 9        |
| Zhu [50]   | 1 | 1 | 0 | 0 | 3  | 0 | 1 | 0 | 1 | 2 | 0 | 2  | 0 | 0 | 0 | 0 | (25.0%)  |
| Zhu [51]   | 0 | 1 | 0 | 0 | -3 | 0 | 1 | 0 | 2 | 0 | 0 | 2  | 0 | 0 | 0 | 0 | (25.0%)  |
|            | 0 | 1 | 0 | 0 | 3  | 1 | 1 | 0 | 2 | 0 | 0 | 2  | 0 | 2 | 0 | 0 | 2 (5.6%) |

**Supplementary Table 4:** Radiomics quality score of the included studies assessed by the Reader 3.

|               | Item 1 | Item 2 | Item 3 | Item 4 | Item 5 | Item 6 | Item 7 | Item 8 | Item 9 | Item 10 | Item 11 | Item 12 | Item 13 | Item 14 | Item 15 | Item 16 | RQS (%)       |
|---------------|--------|--------|--------|--------|--------|--------|--------|--------|--------|---------|---------|---------|---------|---------|---------|---------|---------------|
| Chu [14]      | 1      | 1      | 0      | 0      | 3      | 1      | 0      | 1      | 2      | 0       | 0       | 3       | 0       | 2       | 0       | 0       | 14<br>(38.9%) |
| Duda [15]     | 1      | 0      | 0      | 0      | -3     | 0      | 0      | 0      | 1      | 0       | 0       | -5      | 0       | 0       | 0       | 0       | -6 (0%)       |
| Hamn [16]     | 1      | 1      | 0      | 0      | 3      | 0      | 0      | 0      | 0      | 0       | 0       | 2       | 0       | 0       | 0       | 0       | 7<br>(19.4%)  |
| Huang [17]    | 0      | 1      | 0      | 0      | 3      | 0      | 0      | 0      | 2      | 0       | 0       | -5      | 2       | 2       | 0       | 0       | 5<br>(13.9%)  |
| Ji [18]       | 1      | 1      | 0      | 0      | 3      | 1      | 0      | 1      | 2      | 2       | 0       | 2       | 0       | 2       | 0       | 0       | 15<br>(41.7%) |
| Ji [19]       | 1      | 1      | 0      | 0      | 3      | 0      | 0      | 1      | 2      | 2       | 0       | 2       | 0       | 2       | 0       | 0       | 14<br>(38.9%) |
| King [20]     | 0      | 1      | 0      | 0      | -3     | 0      | 0      | 0      | 2      | 0       | 0       | 2       | 0       | 0       | 0       | 0       | 2 (5.6%)      |
| Liang [21]    | 1      | 1      | 0      | 0      | 3      | 0      | 0      | 0      | 2      | 2       | 0       | -5      | 0       | 2       | 0       | 0       | 6<br>(16.7%)  |
| Liu [22]      | 1      | 1      | 0      | 0      | -3     | 0      | 0      | 0      | 2      | 0       | 0       | -5      | 0       | 2       | 0       | 0       | -2 (0%)       |
| Mosconi [23]  | 1      | 1      | 0      | 0      | -3     | 0      | 0      | 1      | 1      | 0       | 0       | -5      | 0       | 2       | 0       | 0       | -2 (0%)       |
| Nakai [24]    | 1      | 1      | 0      | 0      | 3      | 1      | 0      | 0      | 2      | 2       | 0       | 2       | 0       | 2       | 0       | 0       | 14<br>(38.9%) |
| Park [25]     | 1      | 1      | 0      | 0      | 3      | 0      | 0      | 1      | 2      | 2       | 0       | 5       | 0       | 2       | 0       | 0       | 17<br>(47.2%) |
| Park [26]     | 1      | 1      | 0      | 0      | -3     | 0      | 0      | 0      | 2      | 0       | 0       | -5      | 0       | 0       | 0       | 0       | -4 (0%)       |
| Ponnoprat[27] | 1      | 1      | 0      | 0      | 3      | 0      | 0      | 0      | 2      | 0       | 0       | 2       | 0       | 2       | 0       | 0       | 11<br>(30.6%) |
| Qin [28]      | 0      | 1      | 0      | 0      | 3      | 1      | 0      | 1      | 2      | 2       | 0       | 3       | 0       | 2       | 0       | 0       | 15<br>(41.7%) |
| Sadot [29]    | 1      | 0      | 0      | 0      | -3     | 1      | 1      | 0      | 2      | 0       | 0       | -5      | 0       | 2       | 0       | 0       | -1 (0%)       |
| Silva [30]    | 0      | 1      | 0      | 0      | -3     | 0      | 0      | 1      | 1      | 0       | 0       | -5      | 0       | 2       | 0       | 0       | -3 (0%)       |
| Tang [31]     | 1      | 0      | 0      | 0      | 3      | 1      | 0      | 1      | 2      | 0       | 0       | 2       | 0       | 2       | 0       | 1       | 13<br>(36.1%) |
| Tang [32]     | 1      | 1      | 0      | 0      | 3      | 1      | 0      | 1      | 2      | 2       | 0       | 2       | 0       | 2       | 0       | 0       | 15<br>(41.7%) |

|            |   |   |   |   |   |   |   |   |   |   |   |    |   |   |   |   |            |
|------------|---|---|---|---|---|---|---|---|---|---|---|----|---|---|---|---|------------|
| Wang [33]  | 0 | 0 | 0 | 0 | 3 | 1 | 0 | 0 | 1 | 0 | 0 | -5 | 0 | 2 | 0 | 0 | 2 (5.6%)   |
| Wang [34]  | 1 | 1 | 0 | 0 | 3 | 1 | 0 | 0 | 1 | 0 | 0 | 3  | 1 | 2 | 0 | 0 | 13 (36.1%) |
| Xu [35]    | 1 | 1 | 0 | 0 | 3 | 1 | 0 | 0 | 2 | 0 | 0 | 2  | 0 | 2 | 0 | 0 | 12 (33.3%) |
| Xu [36]    | 0 | 1 | 0 | 0 | 3 | 0 | 0 | 0 | 1 | 0 | 0 | 2  | 0 | 0 | 0 | 0 | 7 (19.4%)  |
| Xu [37]    | 1 | 1 | 0 | 0 | 3 | 0 | 0 | 0 | 2 | 2 | 0 | 2  | 0 | 2 | 0 | 0 | 13 (36.1%) |
| Xue [38]   | 1 | 1 | 0 | 0 | 3 | 0 | 0 | 0 | 2 | 2 | 0 | 2  | 0 | 2 | 0 | 0 | 13 (36.1%) |
| Xue [39]   | 1 | 1 | 0 | 0 | 3 | 1 | 0 | 0 | 2 | 2 | 0 | 2  | 0 | 2 | 0 | 0 | 14 (38.9%) |
| Yang [40]  | 1 | 1 | 0 | 0 | 3 | 1 | 0 | 0 | 1 | 0 | 0 | 2  | 0 | 0 | 0 | 0 | 9 (25.0%)  |
| Yao [41]   | 1 | 1 | 0 | 0 | 3 | 1 | 0 | 1 | 2 | 0 | 0 | 2  | 0 | 0 | 0 | 0 | 11 (30.6%) |
| Zhang [42] | 1 | 0 | 0 | 0 | 3 | 1 | 1 | 0 | 2 | 0 | 0 | -5 | 0 | 2 | 0 | 0 | 5 (13.9%)  |
| Zhang [43] | 1 | 0 | 0 | 0 | 3 | 1 | 0 | 0 | 2 | 0 | 0 | -5 | 0 | 2 | 0 | 0 | 4 (11.1%)  |
| Zhang [44] | 1 | 1 | 0 | 0 | 3 | 1 | 0 | 0 | 2 | 2 | 0 | 2  | 0 | 2 | 0 | 0 | 14 (38.9%) |
| Zhang [45] | 1 | 1 | 0 | 0 | 3 | 1 | 1 | 1 | 2 | 2 | 0 | -5 | 0 | 2 | 0 | 0 | 9 (25.0%)  |
| Zhao [46]  | 0 | 1 | 0 | 0 | 3 | 0 | 0 | 1 | 2 | 2 | 0 | -5 | 0 | 2 | 0 | 0 | 6 (16.7%)  |
| Zhao [47]  | 1 | 1 | 0 | 0 | 3 | 1 | 0 | 1 | 2 | 2 | 0 | 2  | 0 | 2 | 0 | 0 | 15 (41.7%) |
| Zhao [48]  | 1 | 1 | 0 | 0 | 3 | 1 | 1 | 0 | 2 | 0 | 0 | -5 | 0 | 2 | 0 | 0 | 6 (16.7%)  |
| Zhou [49]  | 1 | 1 | 0 | 0 | 3 | 0 | 0 | 0 | 2 | 1 | 0 | 2  | 0 | 2 | 0 | 0 | 12 (33.3%) |
| Zhu [50]   | 0 | 1 | 0 | 0 | 3 | 0 | 1 | 0 | 2 | 0 | 0 | 2  | 0 | 2 | 0 | 0 | 11 (30.6%) |



|          |   |   |   |   |   |   |   |   |   |   |   |    |   |   |   |   |              |
|----------|---|---|---|---|---|---|---|---|---|---|---|----|---|---|---|---|--------------|
| Zhu [51] | 1 | 1 | 0 | 0 | 3 | 1 | 0 | 1 | 2 | 2 | 0 | -5 | 0 | 2 | 0 | 1 | 9<br>(25.0%) |
|----------|---|---|---|---|---|---|---|---|---|---|---|----|---|---|---|---|--------------|
